# Supplementary material for: Quantifying Cross and Direct Network Effects in Online Consumer-to-Consumer Platforms
Source: Atypon-hosted journal article supplement (doi:10.1287/mksc.2016.0976), 2016-07-06
Supplement: mksc.2016.0976-sm.pdf [file mksc.2016.0976-sm.pdf]

## Appendix A: Comparison of Model Specifications

We compare six models with different combinations of time trend, DNEs and CNEs as follows:

Model 1: Without time trend or DNE, but with year\*month\*CNEs

Model 2: Without DNE, but with time trend and year\*month\*CNEs

Model 3: Without time trend, but with constant DNE and year\*month\*CNEs

Model 4: With time trend, constant CNE, and year\*month\*DNEs

Model 5: With time trend, constant DNE, and year\*month\*CNEs

Model 6: With year\*month fixed effects, constant CNE and constant DNE

For the time trend in Models 1 through 5, we include a linear and a quadratic time trend. It turns out that neither of the time trend coefficients is significant, both for the buyer model and the seller model (Table A1). We find that after accounting for CNEs and time trend, DNE becomes either insignificant or much smaller (about 1/7~1/10) than CNEs (Tables A1 – A2). Specifically, there exists a small and positive DNE among buyers, a negative but insignificant DNE among sellers. More importantly, the CNEs are *not* affected by the inclusion of DNE and time trend. We choose Model 5 as our final model.

**Table A1: Models with different combinations of linear and quadratic time trend, DNEs and CNEs\***

|             | Model 1: No time trend,<br>no DNE, year*month*CNE |       |              |       | Model 2: with time trend,<br>no DNEs, year*month*CNE |       |              |       | Model 3: No time trend, constant<br>DNE, year*month*CNE |       |              |       | Model 4: time trend, constant CNE,<br>year*month*DNE |       |              |       | Model 5: time trend, constant<br>DNE, year*month*CNE |       |              |       |
|-------------|---------------------------------------------------|-------|--------------|-------|------------------------------------------------------|-------|--------------|-------|---------------------------------------------------------|-------|--------------|-------|------------------------------------------------------|-------|--------------|-------|------------------------------------------------------|-------|--------------|-------|
|             | Buyer model                                       |       | Seller model |       | Buyer model                                          |       | Seller model |       | Buyer model                                             |       | Seller model |       | Buyer model                                          |       | Seller model |       | Buyer model                                          |       | Seller model |       |
|             | Est                                               | se    | est          | se    | Est                                                  | se    | Est          | se    | Est                                                     | se    | est          | se    | est                                                  | se    | est          | se    | est                                                  | Se    | est          | se    |
| Intercept   | -29.262                                           | 1.294 | -17.319      | 0.551 | -30.718                                              | 2.400 | -17.249      | 0.760 | -28.351                                                 | 1.365 | -16.030      | 1.236 | -30.475                                              | 2.315 | -15.898      | 1.456 | -29.890                                              | 2.233 | -16.054      | 1.632 |
| t/100       |                                                   |       |              |       | -0.143                                               | 0.204 | 0.092        | 0.117 |                                                         |       |              |       | -0.144                                               | 0.190 | 0.133        | 0.102 | -0.124                                               | 0.175 | 0.176        | 0.131 |
| (t/100)^2   |                                                   |       |              |       | -0.001                                               | 0.004 | -0.004       | 0.003 |                                                         |       |              |       | -0.001                                               | 0.004 | -0.005       | 0.003 | -0.001                                               | 0.003 | -0.005       | 0.003 |
| DNEs        |                                                   |       |              |       |                                                      |       |              |       | 0.068                                                   | 0.055 | -0.164       | 0.185 |                                                      |       |              |       | 0.125                                                | 0.063 | -0.167       | 0.240 |
| CNEs        |                                                   |       |              |       |                                                      |       |              |       |                                                         |       |              |       | 1.691                                                | 0.306 | 0.399        | 0.133 |                                                      |       |              |       |
| Nov 2003*NE | 1.554                                             | 0.169 | 0.411        | 0.065 | 1.761                                                | 0.316 | 0.399        | 0.078 | 1.401                                                   | 0.190 | 0.419        | 0.082 | 0.013                                                | 0.034 | -0.177       | 0.212 | 1.560                                                | 0.301 | 0.424        | 0.073 |
| Dec 2003*NE | 1.616                                             | 0.166 | 0.336        | 0.053 | 1.821                                                | 0.315 | 0.327        | 0.069 | 1.442                                                   | 0.193 | 0.362        | 0.074 | 0.114                                                | 0.020 | -0.238       | 0.224 | 1.597                                                | 0.303 | 0.368        | 0.068 |
| Jan 2004*NE | 1.648                                             | 0.164 | 0.280        | 0.048 | 1.886                                                | 0.315 | 0.271        | 0.065 | 1.460                                                   | 0.195 | 0.307        | 0.070 | 0.121                                                | 0.019 | -0.300       | 0.232 | 1.616                                                | 0.307 | 0.307        | 0.066 |
| Feb 2004*NE | 1.668                                             | 0.163 | 0.331        | 0.045 | 1.902                                                | 0.316 | 0.318        | 0.064 | 1.479                                                   | 0.198 | 0.356        | 0.068 | 0.144                                                | 0.018 | -0.260       | 0.237 | 1.633                                                | 0.311 | 0.353        | 0.065 |
| Mar 2004*NE | 1.694                                             | 0.159 | 0.360        | 0.042 | 1.915                                                | 0.314 | 0.345        | 0.063 | 1.504                                                   | 0.196 | 0.387        | 0.066 | 0.165                                                | 0.019 | -0.235       | 0.238 | 1.652                                                | 0.311 | 0.375        | 0.064 |
| Apr 2004*NE | 1.634                                             | 0.155 | 0.342        | 0.040 | 1.846                                                | 0.311 | 0.327        | 0.063 | 1.443                                                   | 0.193 | 0.375        | 0.066 | 0.090                                                | 0.022 | -0.245       | 0.239 | 1.587                                                | 0.310 | 0.361        | 0.064 |
| May 2004*NE | 1.619                                             | 0.151 | 0.371        | 0.039 | 1.831                                                | 0.309 | 0.352        | 0.063 | 1.428                                                   | 0.190 | 0.402        | 0.067 | 0.073                                                | 0.025 | -0.223       | 0.237 | 1.571                                                | 0.309 | 0.382        | 0.066 |
| Jun 2004*NE | 1.629                                             | 0.147 | 0.360        | 0.038 | 1.833                                                | 0.306 | 0.339        | 0.064 | 1.441                                                   | 0.187 | 0.394        | 0.068 | 0.083                                                | 0.028 | -0.233       | 0.235 | 1.583                                                | 0.306 | 0.373        | 0.066 |
| Jul 2004*NE | 1.718                                             | 0.143 | 0.400        | 0.036 | 1.926                                                | 0.304 | 0.378        | 0.063 | 1.529                                                   | 0.184 | 0.434        | 0.069 | 0.170                                                | 0.031 | -0.192       | 0.235 | 1.667                                                | 0.305 | 0.404        | 0.066 |
| Aug 2004*NE | 1.770                                             | 0.139 | 0.394        | 0.034 | 1.972                                                | 0.300 | 0.372        | 0.062 | 1.581                                                   | 0.180 | 0.427        | 0.068 | 0.213                                                | 0.035 | -0.194       | 0.237 | 1.714                                                | 0.303 | 0.391        | 0.066 |
| Sep 2004*NE | 1.776                                             | 0.135 | 0.390        | 0.033 | 1.979                                                | 0.296 | 0.365        | 0.062 | 1.588                                                   | 0.178 | 0.421        | 0.069 | 0.210                                                | 0.037 | -0.196       | 0.238 | 1.717                                                | 0.301 | 0.384        | 0.066 |
| Oct 2004*NE | 1.779                                             | 0.132 | 0.390        | 0.032 | 1.980                                                | 0.294 | 0.368        | 0.061 | 1.594                                                   | 0.176 | 0.424        | 0.069 | 0.206                                                | 0.039 | -0.192       | 0.238 | 1.721                                                | 0.300 | 0.384        | 0.066 |
| Nov 2004*NE | 1.772                                             | 0.128 | 0.395        | 0.032 | 1.971                                                | 0.292 | 0.369        | 0.062 | 1.588                                                   | 0.174 | 0.427        | 0.070 | 0.199                                                | 0.041 | -0.188       | 0.237 | 1.714                                                | 0.298 | 0.388        | 0.067 |
| Dec 2004*NE | 1.746                                             | 0.126 | 0.375        | 0.031 | 1.944                                                | 0.290 | 0.349        | 0.062 | 1.562                                                   | 0.172 | 0.405        | 0.071 | 0.171                                                | 0.043 | -0.207       | 0.236 | 1.686                                                | 0.297 | 0.367        | 0.067 |
| Jan 2005*NE | 1.714                                             | 0.124 | 0.356        | 0.031 | 1.913                                                | 0.290 | 0.331        | 0.063 | 1.528                                                   | 0.171 | 0.384        | 0.072 | 0.139                                                | 0.044 | -0.230       | 0.236 | 1.653                                                | 0.297 | 0.349        | 0.068 |

|             |       |       |       |       |       |       |       |       |       |       |       |       |        |       |        |       |       |       |       |       |
|-------------|-------|-------|-------|-------|-------|-------|-------|-------|-------|-------|-------|-------|--------|-------|--------|-------|-------|-------|-------|-------|
| Feb 2005*NE | 1.711 | 0.123 | 0.367 | 0.031 | 1.910 | 0.292 | 0.340 | 0.064 | 1.524 | 0.170 | 0.395 | 0.072 | 0.135  | 0.044 | -0.219 | 0.236 | 1.651 | 0.298 | 0.353 | 0.068 |
| Mar 2005*NE | 1.747 | 0.121 | 0.384 | 0.030 | 1.948 | 0.292 | 0.354 | 0.064 | 1.563 | 0.169 | 0.417 | 0.072 | 0.173  | 0.045 | -0.201 | 0.236 | 1.690 | 0.298 | 0.367 | 0.068 |
| Apr 2005*NE | 1.763 | 0.119 | 0.385 | 0.029 | 1.964 | 0.292 | 0.355 | 0.064 | 1.579 | 0.167 | 0.420 | 0.072 | 0.184  | 0.047 | -0.200 | 0.236 | 1.705 | 0.298 | 0.373 | 0.068 |
| May 2005*NE | 1.750 | 0.118 | 0.392 | 0.028 | 1.952 | 0.292 | 0.363 | 0.064 | 1.567 | 0.167 | 0.432 | 0.071 | 0.173  | 0.047 | -0.191 | 0.236 | 1.693 | 0.298 | 0.381 | 0.068 |
| Jun 2005*NE | 1.734 | 0.116 | 0.395 | 0.028 | 1.938 | 0.291 | 0.363 | 0.065 | 1.552 | 0.165 | 0.427 | 0.073 | 0.162  | 0.049 | -0.187 | 0.235 | 1.679 | 0.297 | 0.377 | 0.069 |
| Jul 2005*NE | 1.723 | 0.114 | 0.395 | 0.027 | 1.928 | 0.290 | 0.363 | 0.065 | 1.542 | 0.163 | 0.428 | 0.074 | 0.154  | 0.050 | -0.185 | 0.234 | 1.670 | 0.296 | 0.377 | 0.069 |
| Aug 2005*NE | 1.696 | 0.112 | 0.406 | 0.027 | 1.902 | 0.290 | 0.371 | 0.067 | 1.516 | 0.162 | 0.440 | 0.075 | 0.134  | 0.051 | -0.170 | 0.233 | 1.644 | 0.296 | 0.387 | 0.070 |
| Sep 2005*NE | 1.667 | 0.110 | 0.413 | 0.027 | 1.875 | 0.289 | 0.379 | 0.067 | 1.489 | 0.160 | 0.453 | 0.075 | 0.114  | 0.053 | -0.159 | 0.231 | 1.617 | 0.294 | 0.399 | 0.071 |
| Oct 2005*NE | 1.652 | 0.109 | 0.418 | 0.027 | 1.860 | 0.288 | 0.385 | 0.068 | 1.474 | 0.158 | 0.462 | 0.076 | 0.102  | 0.054 | -0.151 | 0.229 | 1.604 | 0.293 | 0.408 | 0.072 |
| Nov 2005*NE | 1.642 | 0.107 | 0.431 | 0.027 | 1.851 | 0.287 | 0.399 | 0.069 | 1.465 | 0.156 | 0.479 | 0.078 | 0.095  | 0.056 | -0.132 | 0.227 | 1.595 | 0.292 | 0.424 | 0.073 |
| Dec 2005*NE | 1.630 | 0.105 | 0.425 | 0.027 | 1.840 | 0.286 | 0.392 | 0.070 | 1.456 | 0.155 | 0.473 | 0.079 | 0.088  | 0.058 | -0.140 | 0.225 | 1.587 | 0.291 | 0.420 | 0.073 |
| Jan 2006*NE | 1.599 | 0.104 | 0.414 | 0.027 | 1.811 | 0.287 | 0.380 | 0.071 | 1.427 | 0.153 | 0.461 | 0.080 | 0.065  | 0.059 | -0.155 | 0.224 | 1.560 | 0.291 | 0.407 | 0.074 |
| Feb 2006*NE | 1.594 | 0.104 | 0.418 | 0.027 | 1.808 | 0.288 | 0.386 | 0.071 | 1.420 | 0.153 | 0.466 | 0.080 | 0.061  | 0.059 | -0.148 | 0.224 | 1.556 | 0.292 | 0.411 | 0.074 |
| Mar 2006*NE | 1.583 | 0.103 | 0.439 | 0.027 | 1.797 | 0.288 | 0.408 | 0.072 | 1.409 | 0.152 | 0.492 | 0.081 | 0.055  | 0.060 | -0.120 | 0.222 | 1.545 | 0.291 | 0.434 | 0.075 |
| Apr 2006*NE | 1.565 | 0.102 | 0.436 | 0.027 | 1.777 | 0.288 | 0.406 | 0.073 | 1.390 | 0.150 | 0.492 | 0.082 | 0.041  | 0.062 | -0.123 | 0.221 | 1.528 | 0.290 | 0.432 | 0.076 |
| May 2006*NE | 1.556 | 0.101 | 0.433 | 0.027 | 1.772 | 0.289 | 0.401 | 0.074 | 1.384 | 0.149 | 0.489 | 0.082 | 0.037  | 0.063 | -0.129 | 0.220 | 1.523 | 0.290 | 0.427 | 0.076 |
| Jun 2006*NE | 1.539 | 0.100 | 0.424 | 0.026 | 1.762 | 0.290 | 0.391 | 0.075 | 1.369 | 0.149 | 0.481 | 0.082 | 0.026  | 0.063 | -0.141 | 0.219 | 1.511 | 0.291 | 0.418 | 0.077 |
| Jul 2006*NE | 1.526 | 0.099 | 0.420 | 0.026 | 1.751 | 0.291 | 0.387 | 0.076 | 1.357 | 0.148 | 0.476 | 0.083 | 0.017  | 0.064 | -0.147 | 0.219 | 1.501 | 0.291 | 0.412 | 0.077 |
| Aug 2006*NE | 1.518 | 0.099 | 0.421 | 0.027 | 1.743 | 0.293 | 0.389 | 0.076 | 1.349 | 0.148 | 0.478 | 0.083 | 0.013  | 0.065 | -0.145 | 0.218 | 1.496 | 0.292 | 0.413 | 0.077 |
| Sep 2006*NE | 1.496 | 0.098 | 0.418 | 0.027 | 1.725 | 0.294 | 0.387 | 0.077 | 1.328 | 0.147 | 0.476 | 0.084 | -0.003 | 0.065 | -0.148 | 0.218 | 1.477 | 0.293 | 0.411 | 0.077 |
| Oct 2006*NE | 1.493 | 0.098 | 0.424 | 0.026 | 1.725 | 0.296 | 0.392 | 0.078 | 1.325 | 0.147 | 0.481 | 0.084 | -0.003 | 0.066 | -0.142 | 0.218 | 1.477 | 0.294 | 0.414 | 0.078 |
| Nov 2006*NE | 1.502 | 0.098 | 0.433 | 0.026 | 1.737 | 0.297 | 0.400 | 0.079 | 1.335 | 0.146 | 0.490 | 0.084 | 0.009  | 0.066 | -0.131 | 0.218 | 1.490 | 0.295 | 0.422 | 0.078 |
| Dec 2006*NE | 1.487 | 0.097 | 0.430 | 0.026 | 1.725 | 0.298 | 0.397 | 0.080 | 1.321 | 0.146 | 0.487 | 0.085 | -0.001 | 0.067 | -0.135 | 0.217 | 1.478 | 0.295 | 0.417 | 0.079 |
| Jan 2007*NE | 1.483 | 0.097 | 0.441 | 0.026 | 1.719 | 0.300 | 0.408 | 0.081 | 1.317 | 0.145 | 0.498 | 0.085 | -0.003 | 0.068 | -0.120 | 0.217 | 1.476 | 0.296 | 0.428 | 0.079 |
| Feb 2007*NE | 1.457 | 0.097 | 0.388 | 0.026 | 1.696 | 0.302 | 0.356 | 0.082 | 1.289 | 0.145 | 0.445 | 0.085 | -0.025 | 0.068 | -0.188 | 0.217 | 1.451 | 0.297 | 0.375 | 0.079 |
| Mar 2007*NE | 1.480 | 0.096 | 0.425 | 0.026 | 1.722 | 0.304 | 0.395 | 0.082 | 1.311 | 0.145 | 0.485 | 0.085 | -0.001 | 0.069 | -0.140 | 0.217 | 1.477 | 0.298 | 0.412 | 0.079 |

|             |       |       |       |       |       |       |       |       |       |       |       |       |        |       |        |       |       |       |       |       |
|-------------|-------|-------|-------|-------|-------|-------|-------|-------|-------|-------|-------|-------|--------|-------|--------|-------|-------|-------|-------|-------|
| Apr 2007*NE | 1.467 | 0.096 | 0.429 | 0.026 | 1.713 | 0.305 | 0.399 | 0.083 | 1.302 | 0.145 | 0.489 | 0.085 | -0.007 | 0.069 | -0.134 | 0.217 | 1.469 | 0.298 | 0.416 | 0.079 |
| May 2007*NE | 1.459 | 0.095 | 0.430 | 0.026 | 1.708 | 0.306 | 0.400 | 0.084 | 1.295 | 0.144 | 0.490 | 0.085 | -0.010 | 0.070 | -0.134 | 0.217 | 1.466 | 0.299 | 0.415 | 0.080 |
| Jun 2007*NE | 1.458 | 0.095 | 0.425 | 0.025 | 1.710 | 0.308 | 0.394 | 0.085 | 1.294 | 0.144 | 0.484 | 0.086 | -0.009 | 0.071 | -0.141 | 0.217 | 1.468 | 0.300 | 0.410 | 0.080 |
| Jul 2007*NE | 1.456 | 0.095 | 0.423 | 0.025 | 1.711 | 0.309 | 0.392 | 0.085 | 1.292 | 0.144 | 0.482 | 0.086 | -0.008 | 0.071 | -0.143 | 0.217 | 1.468 | 0.301 | 0.406 | 0.080 |
| Aug 2007*NE | 1.457 | 0.095 | 0.429 | 0.025 | 1.715 | 0.311 | 0.400 | 0.086 | 1.293 | 0.143 | 0.489 | 0.086 | -0.004 | 0.072 | -0.134 | 0.217 | 1.473 | 0.302 | 0.412 | 0.081 |
| Sep 2007*NE | 1.450 | 0.094 | 0.427 | 0.025 | 1.711 | 0.312 | 0.397 | 0.087 | 1.287 | 0.143 | 0.485 | 0.086 | -0.006 | 0.072 | -0.136 | 0.217 | 1.470 | 0.302 | 0.409 | 0.081 |
| Oct 2007*NE | 1.443 | 0.094 | 0.435 | 0.025 | 1.707 | 0.313 | 0.405 | 0.088 | 1.281 | 0.143 | 0.492 | 0.087 | -0.009 | 0.073 | -0.126 | 0.217 | 1.466 | 0.303 | 0.416 | 0.081 |
| Nov 2007*NE | 1.437 | 0.094 | 0.439 | 0.025 | 1.704 | 0.314 | 0.411 | 0.088 | 1.275 | 0.142 | 0.499 | 0.087 | -0.012 | 0.074 | -0.120 | 0.216 | 1.463 | 0.304 | 0.421 | 0.082 |
| Dec 2007*NE | 1.443 | 0.093 | 0.433 | 0.025 | 1.713 | 0.315 | 0.406 | 0.088 | 1.282 | 0.142 | 0.493 | 0.087 | -0.005 | 0.074 | -0.127 | 0.216 | 1.472 | 0.304 | 0.416 | 0.082 |
| Jan 2008*NE | 1.431 | 0.093 | 0.419 | 0.024 | 1.704 | 0.316 | 0.393 | 0.089 | 1.269 | 0.142 | 0.480 | 0.087 | -0.013 | 0.075 | -0.143 | 0.216 | 1.463 | 0.305 | 0.402 | 0.082 |
| Feb 2008*NE | 1.438 | 0.093 | 0.415 | 0.025 | 1.714 | 0.318 | 0.391 | 0.089 | 1.276 | 0.142 | 0.477 | 0.087 | -0.006 | 0.075 | -0.147 | 0.217 | 1.473 | 0.306 | 0.398 | 0.082 |
| Mar 2008*NE | 1.463 | 0.093 | 0.445 | 0.025 | 1.740 | 0.319 | 0.423 | 0.090 | 1.300 | 0.141 | 0.509 | 0.087 | 0.018  | 0.076 | -0.106 | 0.217 | 1.500 | 0.307 | 0.430 | 0.082 |
| Apr 2008*NE | 1.438 | 0.092 | 0.445 | 0.025 | 1.717 | 0.319 | 0.424 | 0.090 | 1.275 | 0.141 | 0.509 | 0.087 | -0.001 | 0.076 | -0.105 | 0.217 | 1.477 | 0.307 | 0.430 | 0.083 |
| May 2008*NE | 1.415 | 0.092 | 0.438 | 0.025 | 1.697 | 0.320 | 0.417 | 0.091 | 1.253 | 0.140 | 0.501 | 0.088 | -0.017 | 0.077 | -0.113 | 0.216 | 1.457 | 0.307 | 0.424 | 0.083 |
| Jun 2008*NE | 1.420 | 0.092 | 0.435 | 0.025 | 1.706 | 0.320 | 0.415 | 0.091 | 1.258 | 0.140 | 0.498 | 0.088 | -0.011 | 0.077 | -0.117 | 0.216 | 1.465 | 0.307 | 0.421 | 0.083 |
| Jul 2008*NE | 1.422 | 0.091 | 0.430 | 0.025 | 1.712 | 0.321 | 0.411 | 0.092 | 1.261 | 0.140 | 0.494 | 0.088 | -0.006 | 0.078 | -0.121 | 0.216 | 1.472 | 0.308 | 0.418 | 0.083 |
| Aug 2008*NE | 1.415 | 0.091 | 0.426 | 0.024 | 1.708 | 0.322 | 0.408 | 0.092 | 1.254 | 0.140 | 0.490 | 0.087 | -0.010 | 0.078 | -0.127 | 0.216 | 1.467 | 0.309 | 0.414 | 0.083 |
| Sep 2008*NE | 1.418 | 0.091 | 0.429 | 0.024 | 1.714 | 0.324 | 0.412 | 0.092 | 1.254 | 0.140 | 0.494 | 0.088 | -0.007 | 0.079 | -0.121 | 0.217 | 1.471 | 0.310 | 0.416 | 0.083 |
| Oct 2008*NE | 1.419 | 0.091 | 0.437 | 0.024 | 1.717 | 0.325 | 0.420 | 0.093 | 1.259 | 0.140 | 0.500 | 0.088 | 0.000  | 0.079 | -0.110 | 0.217 | 1.478 | 0.310 | 0.424 | 0.084 |
| Nov 2008*NE | 1.417 | 0.090 | 0.443 | 0.024 | 1.718 | 0.325 | 0.427 | 0.093 | 1.256 | 0.139 | 0.505 | 0.088 | 0.001  | 0.079 | -0.102 | 0.217 | 1.479 | 0.311 | 0.429 | 0.084 |
| Dec 2008*NE | 1.430 | 0.090 | 0.436 | 0.023 | 1.735 | 0.326 | 0.420 | 0.094 | 1.271 | 0.139 | 0.497 | 0.088 | 0.014  | 0.080 | -0.109 | 0.217 | 1.496 | 0.311 | 0.421 | 0.084 |
| Jan 2009*NE | 1.411 | 0.090 | 0.416 | 0.023 | 1.719 | 0.327 | 0.402 | 0.094 | 1.252 | 0.139 | 0.479 | 0.088 | 0.001  | 0.080 | -0.134 | 0.217 | 1.480 | 0.312 | 0.402 | 0.084 |
| Feb 2009*NE | 1.409 | 0.090 | 0.449 | 0.023 | 1.718 | 0.328 | 0.436 | 0.094 | 1.248 | 0.139 | 0.512 | 0.088 | 0.001  | 0.081 | -0.092 | 0.217 | 1.480 | 0.313 | 0.434 | 0.084 |
| Mar 2009*NE | 1.403 | 0.090 | 0.464 | 0.024 | 1.714 | 0.327 | 0.454 | 0.095 | 1.243 | 0.139 | 0.529 | 0.088 | 0.000  | 0.081 | -0.069 | 0.217 | 1.477 | 0.312 | 0.451 | 0.085 |
| Apr 2009*NE | 1.424 | 0.089 | 0.461 | 0.024 | 1.738 | 0.327 | 0.453 | 0.095 | 1.265 | 0.138 | 0.526 | 0.089 | 0.018  | 0.082 | -0.069 | 0.216 | 1.501 | 0.311 | 0.450 | 0.085 |
| May 2009*NE | 1.387 | 0.089 | 0.455 | 0.024 | 1.702 | 0.327 | 0.448 | 0.096 | 1.228 | 0.137 | 0.521 | 0.089 | -0.010 | 0.082 | -0.075 | 0.216 | 1.466 | 0.311 | 0.447 | 0.085 |

|             |       |       |       |       |       |       |       |       |       |       |       |       |        |       |        |       |       |       |       |       |
|-------------|-------|-------|-------|-------|-------|-------|-------|-------|-------|-------|-------|-------|--------|-------|--------|-------|-------|-------|-------|-------|
| Jun 2009*NE | 1.376 | 0.088 | 0.453 | 0.024 | 1.693 | 0.327 | 0.447 | 0.096 | 1.217 | 0.137 | 0.519 | 0.090 | -0.017 | 0.082 | -0.076 | 0.216 | 1.458 | 0.311 | 0.446 | 0.085 |
| Jul 2009*NE | 1.369 | 0.088 | 0.446 | 0.024 | 1.690 | 0.327 | 0.442 | 0.097 | 1.211 | 0.137 | 0.513 | 0.090 | -0.020 | 0.083 | -0.083 | 0.216 | 1.455 | 0.311 | 0.441 | 0.086 |
| Aug 2009*NE | 1.370 | 0.088 | 0.445 | 0.024 | 1.693 | 0.328 | 0.441 | 0.097 | 1.212 | 0.137 | 0.510 | 0.090 | -0.017 | 0.083 | -0.083 | 0.216 | 1.459 | 0.312 | 0.440 | 0.086 |
| Sep 2009*NE | 1.371 | 0.088 | 0.446 | 0.024 | 1.699 | 0.328 | 0.444 | 0.097 | 1.213 | 0.136 | 0.512 | 0.090 | -0.013 | 0.083 | -0.079 | 0.216 | 1.464 | 0.312 | 0.442 | 0.086 |
| Oct 2009*NE | 1.370 | 0.088 | 0.454 | 0.024 | 1.700 | 0.329 | 0.454 | 0.097 | 1.211 | 0.136 | 0.520 | 0.090 | -0.012 | 0.084 | -0.068 | 0.216 | 1.465 | 0.312 | 0.450 | 0.086 |
| Nov 2009*NE | 1.371 | 0.087 | 0.451 | 0.023 | 1.705 | 0.329 | 0.451 | 0.097 | 1.213 | 0.136 | 0.517 | 0.090 | -0.008 | 0.084 | -0.071 | 0.216 | 1.470 | 0.313 | 0.447 | 0.086 |
| Dec 2009*NE | 1.364 | 0.087 | 0.449 | 0.023 | 1.701 | 0.330 | 0.451 | 0.098 | 1.206 | 0.136 | 0.514 | 0.091 | -0.011 | 0.084 | -0.072 | 0.216 | 1.466 | 0.313 | 0.446 | 0.087 |
| Jan 2010*NE | 1.364 | 0.087 | 0.443 | 0.023 | 1.704 | 0.330 | 0.446 | 0.098 | 1.206 | 0.136 | 0.508 | 0.091 | -0.009 | 0.085 | -0.078 | 0.216 | 1.469 | 0.314 | 0.440 | 0.087 |
| Feb 2010*NE | 1.352 | 0.087 | 0.430 | 0.023 | 1.697 | 0.331 | 0.435 | 0.098 | 1.195 | 0.137 | 0.496 | 0.090 | -0.016 | 0.085 | -0.092 | 0.217 | 1.462 | 0.314 | 0.429 | 0.087 |
| Mar 2010*NE | 1.361 | 0.087 | 0.459 | 0.024 | 1.708 | 0.332 | 0.467 | 0.099 | 1.203 | 0.136 | 0.525 | 0.091 | -0.005 | 0.085 | -0.052 | 0.217 | 1.473 | 0.315 | 0.460 | 0.087 |
| Apr 2010*NE | 1.377 | 0.087 | 0.468 | 0.023 | 1.726 | 0.332 | 0.475 | 0.099 | 1.219 | 0.136 | 0.531 | 0.091 | 0.011  | 0.086 | -0.041 | 0.217 | 1.492 | 0.314 | 0.468 | 0.087 |
| May 2010*NE | 1.364 | 0.087 | 0.471 | 0.023 | 1.715 | 0.332 | 0.481 | 0.099 | 1.206 | 0.135 | 0.536 | 0.091 | 0.002  | 0.086 | -0.035 | 0.217 | 1.482 | 0.314 | 0.473 | 0.087 |
| Jun 2010*NE | 1.356 | 0.086 | 0.466 | 0.023 | 1.710 | 0.331 | 0.477 | 0.099 | 1.198 | 0.135 | 0.530 | 0.091 | -0.002 | 0.086 | -0.040 | 0.217 | 1.477 | 0.314 | 0.468 | 0.087 |
| Jul 2010*NE | 1.347 | 0.086 | 0.462 | 0.023 | 1.704 | 0.331 | 0.475 | 0.099 | 1.189 | 0.135 | 0.525 | 0.092 | -0.007 | 0.086 | -0.042 | 0.217 | 1.472 | 0.314 | 0.465 | 0.088 |
| Aug 2010*NE | 1.345 | 0.086 | 0.455 | 0.023 | 1.705 | 0.332 | 0.472 | 0.099 | 1.188 | 0.135 | 0.520 | 0.092 | -0.006 | 0.087 | -0.047 | 0.217 | 1.473 | 0.314 | 0.461 | 0.088 |
| Sep 2010*NE | 1.350 | 0.086 | 0.456 | 0.023 | 1.715 | 0.332 | 0.475 | 0.100 | 1.194 | 0.135 | 0.521 | 0.092 | 0.001  | 0.087 | -0.042 | 0.217 | 1.482 | 0.314 | 0.466 | 0.088 |
| Oct 2010*NE | 1.355 | 0.086 | 0.465 | 0.023 | 1.724 | 0.332 | 0.486 | 0.100 | 1.199 | 0.135 | 0.531 | 0.092 | 0.008  | 0.087 | -0.027 | 0.217 | 1.491 | 0.315 | 0.475 | 0.088 |
| Nov 2010*NE | 1.359 | 0.086 | 0.470 | 0.023 | 1.730 | 0.332 | 0.492 | 0.100 | 1.202 | 0.134 | 0.537 | 0.092 | 0.013  | 0.087 | -0.020 | 0.217 | 1.497 | 0.315 | 0.484 | 0.088 |
| Dec 2010*NE | 1.350 | 0.085 | 0.483 | 0.023 | 1.723 | 0.331 | 0.507 | 0.100 | 1.193 | 0.134 | 0.550 | 0.092 | 0.008  | 0.088 | -0.001 | 0.217 | 1.491 | 0.314 | 0.498 | 0.088 |
| Jan 2011*NE | 1.327 | 0.085 | 0.472 | 0.023 | 1.702 | 0.331 | 0.501 | 0.100 | 1.170 | 0.134 | 0.543 | 0.092 | -0.009 | 0.088 | -0.009 | 0.216 | 1.470 | 0.314 | 0.494 | 0.088 |
| Feb 2011*NE | 1.322 | 0.085 | 0.480 | 0.023 | 1.699 | 0.331 | 0.512 | 0.100 | 1.165 | 0.134 | 0.552 | 0.092 | -0.010 | 0.088 | 0.003  | 0.216 | 1.469 | 0.314 | 0.504 | 0.088 |
| Mar 2011*NE | 1.330 | 0.084 | 0.496 | 0.023 | 1.710 | 0.330 | 0.530 | 0.100 | 1.175 | 0.133 | 0.568 | 0.093 | 0.000  | 0.088 | 0.026  | 0.216 | 1.481 | 0.313 | 0.521 | 0.089 |
| Apr 2011*NE | 1.326 | 0.084 | 0.494 | 0.022 | 1.708 | 0.328 | 0.526 | 0.101 | 1.172 | 0.132 | 0.563 | 0.093 | -0.002 | 0.089 | 0.021  | 0.215 | 1.480 | 0.312 | 0.518 | 0.089 |
| May 2011*NE | 1.322 | 0.084 | 0.490 | 0.022 | 1.706 | 0.328 | 0.524 | 0.101 | 1.167 | 0.132 | 0.560 | 0.094 | -0.004 | 0.089 | 0.019  | 0.215 | 1.478 | 0.311 | 0.518 | 0.089 |
| Jun 2011*NE | 1.324 | 0.084 | 0.481 | 0.023 | 1.710 | 0.327 | 0.518 | 0.101 | 1.169 | 0.132 | 0.552 | 0.094 | 0.000  | 0.090 | 0.011  | 0.215 | 1.483 | 0.311 | 0.511 | 0.089 |
| Jul 2011*NE | 1.316 | 0.083 | 0.477 | 0.022 | 1.707 | 0.327 | 0.515 | 0.101 | 1.162 | 0.132 | 0.547 | 0.094 | -0.003 | 0.090 | 0.008  | 0.215 | 1.480 | 0.311 | 0.509 | 0.090 |

|               |        |       |        |       |        |       |        |       |        |       |        |       |        |       |        |       |        |       |        |       |
|---------------|--------|-------|--------|-------|--------|-------|--------|-------|--------|-------|--------|-------|--------|-------|--------|-------|--------|-------|--------|-------|
| Aug 2011*NE   | 1.313  | 0.083 | 0.475  | 0.022 | 1.707  | 0.327 | 0.515  | 0.101 | 1.159  | 0.132 | 0.544  | 0.094 | -0.003 | 0.090 | 0.008  | 0.215 | 1.480  | 0.311 | 0.508  | 0.090 |
| Sep 2011*NE   | 1.324  | 0.083 | 0.468  | 0.022 | 1.719  | 0.327 | 0.511  | 0.101 | 1.167  | 0.132 | 0.538  | 0.094 | 0.006  | 0.090 | 0.003  | 0.215 | 1.491  | 0.311 | 0.503  | 0.090 |
| Oct 2011*NE   | 1.331  | 0.083 | 0.471  | 0.022 | 1.732  | 0.327 | 0.515  | 0.101 | 1.177  | 0.132 | 0.540  | 0.094 | 0.017  | 0.090 | 0.009  | 0.216 | 1.506  | 0.311 | 0.508  | 0.090 |
| Nov 2011*NE   | 1.339  | 0.083 | 0.462  | 0.022 | 1.743  | 0.327 | 0.510  | 0.101 | 1.184  | 0.132 | 0.533  | 0.094 | 0.026  | 0.091 | 0.002  | 0.216 | 1.516  | 0.311 | 0.502  | 0.090 |
| Dec 2011*NE   | 1.334  | 0.083 | 0.445  | 0.022 | 1.742  | 0.327 | 0.498  | 0.101 | 1.179  | 0.132 | 0.519  | 0.094 | 0.024  | 0.091 | -0.013 | 0.217 | 1.515  | 0.312 | 0.489  | 0.090 |
| Jan 2012*NE   | 1.315  | 0.083 | 0.426  | 0.022 | 1.727  | 0.328 | 0.479  | 0.101 | 1.158  | 0.132 | 0.498  | 0.093 | 0.011  | 0.091 | -0.036 | 0.217 | 1.499  | 0.312 | 0.471  | 0.090 |
| Feb 2012*NE   | 1.337  | 0.083 | 0.460  | 0.022 | 1.753  | 0.328 | 0.515  | 0.101 | 1.181  | 0.132 | 0.529  | 0.093 | 0.033  | 0.091 | 0.008  | 0.218 | 1.525  | 0.313 | 0.502  | 0.090 |
| Mar 2012*NE   | 1.354  | 0.083 | 0.471  | 0.022 | 1.776  | 0.328 | 0.530  | 0.101 | 1.201  | 0.132 | 0.542  | 0.093 | 0.052  | 0.091 | 0.026  | 0.218 | 1.549  | 0.312 | 0.516  | 0.090 |
| Apr 2012*NE   | 1.352  | 0.083 | 0.465  | 0.022 | 1.775  | 0.327 | 0.527  | 0.101 | 1.197  | 0.132 | 0.536  | 0.093 | 0.050  | 0.092 | 0.022  | 0.218 | 1.548  | 0.312 | 0.514  | 0.090 |
| May 2012*NE   | 1.351  | 0.083 | 0.465  | 0.022 | 1.777  | 0.327 | 0.527  | 0.102 | 1.196  | 0.132 | 0.534  | 0.093 | 0.053  | 0.092 | 0.025  | 0.219 | 1.551  | 0.312 | 0.514  | 0.090 |
| Jun 2012*NE   | 1.349  | 0.083 | 0.462  | 0.022 | 1.779  | 0.327 | 0.527  | 0.102 | 1.194  | 0.132 | 0.531  | 0.093 | 0.055  | 0.092 | 0.025  | 0.219 | 1.553  | 0.312 | 0.515  | 0.090 |
| Jul 2012*NE   | 1.338  | 0.083 | 0.458  | 0.023 | 1.773  | 0.327 | 0.528  | 0.102 | 1.184  | 0.132 | 0.529  | 0.093 | 0.050  | 0.092 | 0.025  | 0.219 | 1.546  | 0.312 | 0.516  | 0.090 |
| Aug 2012*NE   | 1.339  | 0.083 | 0.452  | 0.023 | 1.777  | 0.327 | 0.527  | 0.102 | 1.183  | 0.132 | 0.526  | 0.093 | 0.052  | 0.093 | 0.024  | 0.220 | 1.550  | 0.312 | 0.515  | 0.090 |
| Sep 2012*NE   | 1.350  | 0.083 | 0.453  | 0.023 | 1.791  | 0.326 | 0.531  | 0.102 | 1.193  | 0.132 | 0.527  | 0.093 | 0.063  | 0.093 | 0.029  | 0.220 | 1.563  | 0.312 | 0.520  | 0.090 |
| Oct 2012*NE   | 1.357  | 0.083 | 0.459  | 0.023 | 1.801  | 0.326 | 0.541  | 0.102 | 1.199  | 0.132 | 0.534  | 0.093 | 0.072  | 0.093 | 0.041  | 0.221 | 1.574  | 0.312 | 0.527  | 0.090 |
| Nov 2012*NE   | 1.367  | 0.083 | 0.461  | 0.022 | 1.814  | 0.326 | 0.542  | 0.102 | 1.209  | 0.132 | 0.529  | 0.093 | 0.083  | 0.093 | 0.044  | 0.221 | 1.587  | 0.312 | 0.522  | 0.091 |
| Dec 2012*NE   | 1.369  | 0.083 | 0.454  | 0.022 | 1.817  | 0.325 | 0.538  | 0.102 | 1.210  | 0.132 | 0.522  | 0.093 | 0.086  | 0.094 | 0.039  | 0.221 | 1.592  | 0.312 | 0.522  | 0.091 |
| Ln(Price)     | 0.016  | 0.018 | 0.079  | 0.054 | -0.023 | 0.028 | 0.079  | 0.058 | 0.007  | 0.020 | 0.057  | 0.030 | 0.012  | 0.017 | 0.088  | 0.006 | 0.003  | 0.018 | 0.048  | 0.016 |
| Variety       | 1.215  | 0.120 |        |       | 1.397  | 0.092 |        |       | 1.436  | 0.071 |        |       | 1.443  | 0.070 |        |       | 1.439  | 0.061 |        |       |
| Buyer quality |        |       | 0.024  | 0.499 |        |       | 0.011  | 1.148 |        |       | 0.015  | 0.009 |        |       | 0.024  | 0.006 |        |       | 0.025  | 0.009 |
| New Year      | 0.001  | 0.045 | -0.142 | 0.041 | -0.016 | 0.047 | -0.145 | 0.040 | 0.010  | 0.044 | -0.132 | 0.037 | 0.009  | 0.043 | -0.148 | 0.013 | -0.005 | 0.037 | -0.148 | 0.030 |
| CNY           | -0.334 | 0.028 | -0.678 | 0.030 | -0.305 | 0.028 | -0.707 | 0.043 | -0.314 | 0.026 | -0.711 | 0.031 | -0.299 | 0.026 | -0.675 | 0.009 | -0.315 | 0.023 | -0.690 | 0.024 |
| Labor Day     | -0.111 | 0.036 | -0.343 | 0.035 | -0.119 | 0.038 | -0.358 | 0.039 | -0.118 | 0.035 | -0.375 | 0.035 | -0.130 | 0.035 | -0.339 | 0.010 | -0.127 | 0.030 | -0.356 | 0.026 |
| National day  | -0.110 | 0.030 | -0.385 | 0.029 | -0.118 | 0.032 | -0.392 | 0.030 | -0.110 | 0.029 | -0.381 | 0.026 | -0.125 | 0.029 | -0.382 | 0.009 | -0.126 | 0.025 | -0.376 | 0.021 |
| Chingming     | -0.017 | 0.058 | -0.078 | 0.053 | -0.028 | 0.061 | -0.106 | 0.052 | -0.008 | 0.056 | -0.097 | 0.048 | -0.026 | 0.056 | -0.098 | 0.016 | -0.026 | 0.048 | -0.082 | 0.039 |
| Dragon Boat   | -0.078 | 0.058 | -0.124 | 0.053 | -0.067 | 0.060 | -0.124 | 0.051 | -0.066 | 0.056 | -0.127 | 0.048 | -0.068 | 0.055 | -0.113 | 0.016 | -0.065 | 0.048 | -0.120 | 0.039 |

|                 |        |       |        |       |        |       |        |       |        |       |        |       |        |       |        |       |        |       |        |       |
|-----------------|--------|-------|--------|-------|--------|-------|--------|-------|--------|-------|--------|-------|--------|-------|--------|-------|--------|-------|--------|-------|
| Mid-Autumn      | 0.041  | 0.060 | -0.177 | 0.054 | 0.070  | 0.061 | -0.214 | 0.052 | 0.080  | 0.056 | -0.207 | 0.048 | 0.083  | 0.056 | -0.199 | 0.016 | 0.080  | 0.048 | -0.205 | 0.039 |
| Double 11       | 0.524  | 0.125 | -0.171 | 0.118 | 0.538  | 0.130 | -0.165 | 0.126 | 0.551  | 0.121 | -0.177 | 0.113 | 0.545  | 0.119 | -0.166 | 0.035 | 0.545  | 0.103 | -0.188 | 0.090 |
| Double 12       | 0.100  | 0.126 | 0.004  | 0.123 | 0.144  | 0.130 | 0.013  | 0.138 | 0.147  | 0.121 | -0.007 | 0.123 | 0.138  | 0.119 | -0.020 | 0.037 | 0.140  | 0.103 | -0.017 | 0.097 |
| Mon             | 0.074  | 0.014 | 0.100  | 0.014 | 0.072  | 0.015 | 0.106  | 0.016 | 0.070  | 0.014 | 0.106  | 0.013 | 0.071  | 0.013 | 0.100  | 0.004 | 0.070  | 0.011 | 0.100  | 0.010 |
| Tue             | 0.053  | 0.014 | 0.144  | 0.014 | 0.050  | 0.015 | 0.148  | 0.015 | 0.050  | 0.014 | 0.147  | 0.012 | 0.051  | 0.013 | 0.145  | 0.004 | 0.050  | 0.011 | 0.142  | 0.010 |
| Wed             | 0.050  | 0.014 | 0.146  | 0.014 | 0.047  | 0.014 | 0.148  | 0.015 | 0.047  | 0.014 | 0.147  | 0.012 | 0.047  | 0.013 | 0.144  | 0.025 | 0.047  | 0.012 | 0.143  | 0.010 |
| Thu             | 0.039  | 0.014 | 0.141  | 0.014 | 0.038  | 0.014 | 0.143  | 0.014 | 0.036  | 0.014 | 0.143  | 0.012 | 0.035  | 0.013 | 0.140  | 0.019 | 0.036  | 0.012 | 0.139  | 0.010 |
| Fri             | 0.050  | 0.014 | 0.096  | 0.013 | 0.049  | 0.014 | 0.098  | 0.013 | 0.047  | 0.014 | 0.097  | 0.012 | 0.046  | 0.013 | 0.096  | 0.024 | 0.047  | 0.012 | 0.095  | 0.009 |
| Sat             | 0.013  | 0.014 | 0.019  | 0.013 | 0.014  | 0.014 | 0.019  | 0.012 | 0.013  | 0.014 | 0.019  | 0.012 | 0.012  | 0.013 | 0.022  | 0.006 | 0.013  | 0.012 | 0.021  | 0.009 |
| CF              | -0.022 | 0.012 | 0.041  | 0.021 | -0.006 | 0.028 | 0.055  | 0.043 | -0.019 | 0.037 | 0.150  | 0.054 | -0.036 | 0.013 | -0.006 | 0.205 | 0.003  | 0.118 | 0.205  | 0.048 |
| CF <sup>2</sup> | -0.008 | 0.003 | 0.015  | 0.002 | -0.067 | 0.012 | 0.033  | 0.004 | 0.016  | 0.028 | 0.131  | 0.015 | 0.026  | 0.011 | -0.003 | 0.111 | -0.025 | 0.177 | 0.136  | 0.015 |
| $\sigma^B$      | 0.200  | 0.013 |        |       | 0.199  | 0.013 |        |       | 0.200  | 0.013 |        |       | 0.200  | 0.013 |        |       | 0.200  | 0.013 |        |       |
| $\sigma^S$      | 0.151  | 0.013 |        |       | 0.152  | 0.013 |        |       | 0.151  | 0.013 |        |       | 0.153  | 0.013 |        |       | 0.150  | 0.012 |        |       |
| $\rho$          | 0.220  | 0.031 |        |       | 0.233  | 0.027 |        |       | 0.224  | 0.028 |        |       | 0.210  | 0.029 |        |       | 0.180  | 0.028 |        |       |

\*standard errors are adjusted for heteroscedasticity.

**Table A2: Year\*month fixed effects with constant CNE and DNE\***

|           | Buyer model |       | Seller model |       |
|-----------|-------------|-------|--------------|-------|
|           | est         | se    | est          | se    |
| Intercept | -31.072     | 3.368 | -13.965      | 2.234 |
| DNE       | 0.068       | 0.031 | -0.198       | 0.351 |
| CNE       | 1.387       | 0.250 | 0.443        | 0.174 |
| Nov 2003  | 2.855       | 1.515 | -1.984       | 0.614 |
| Dec 2003  | 3.246       | 1.562 | -2.479       | 0.674 |
| Jan 2004  | 3.416       | 1.574 | -2.974       | 0.732 |
| Feb 2004  | 3.567       | 1.578 | -2.659       | 0.770 |
| Mar 2004  | 3.752       | 1.555 | -2.460       | 0.786 |
| Apr 2004  | 3.276       | 1.518 | -2.545       | 0.794 |
| May 2004  | 3.137       | 1.481 | -2.348       | 0.773 |
| Jun 2004  | 3.274       | 1.434 | -2.419       | 0.747 |
| Jul 2004  | 4.040       | 1.389 | -2.044       | 0.746 |
| Aug 2004  | 4.585       | 1.332 | -2.063       | 0.764 |
| Sep 2004  | 4.707       | 1.286 | -2.088       | 0.781 |
| Oct 2004  | 4.822       | 1.244 | -2.038       | 0.782 |
| Nov 2004  | 4.825       | 1.199 | -1.985       | 0.771 |
| Dec 2004  | 4.600       | 1.155 | -2.172       | 0.761 |
| Jan 2005  | 4.288       | 1.128 | -2.399       | 0.761 |
| Feb 2005  | 4.255       | 1.111 | -2.262       | 0.761 |
| Mar 2005  | 4.672       | 1.084 | -2.060       | 0.755 |
| Apr 2005  | 4.880       | 1.049 | -2.037       | 0.759 |
| May 2005  | 4.768       | 1.017 | -1.931       | 0.753 |
| Jun 2005  | 4.638       | 0.983 | -1.870       | 0.739 |
| Jul 2005  | 4.562       | 0.947 | -1.837       | 0.722 |
| Aug 2005  | 4.279       | 0.910 | -1.645       | 0.698 |
| Sep 2005  | 3.990       | 0.868 | -1.501       | 0.661 |
| Oct 2005  | 3.830       | 0.828 | -1.378       | 0.626 |
| Nov 2005  | 3.731       | 0.788 | -1.132       | 0.587 |
| Dec 2005  | 3.643       | 0.745 | -1.201       | 0.549 |
| Jan 2006  | 3.289       | 0.715 | -1.367       | 0.527 |
| Feb 2006  | 3.216       | 0.702 | -1.271       | 0.519 |
| Mar 2006  | 3.064       | 0.671 | -0.892       | 0.490 |
| Apr 2006  | 2.829       | 0.636 | -0.912       | 0.453 |
| May 2006  | 2.745       | 0.608 | -0.967       | 0.429 |
| Jun 2006  | 2.556       | 0.589 | -1.104       | 0.413 |
| Jul 2006  | 2.400       | 0.575 | -1.173       | 0.401 |
| Aug 2006  | 2.292       | 0.561 | -1.133       | 0.391 |
| Sep 2006  | 2.007       | 0.549 | -1.157       | 0.381 |
| Oct 2006  | 1.964       | 0.537 | -1.068       | 0.372 |
| Nov 2006  | 2.101       | 0.523 | -0.917       | 0.360 |
| Dec 2006  | 1.914       | 0.508 | -0.961       | 0.347 |

|          |        |       |        |       |
|----------|--------|-------|--------|-------|
| Jan 2007 | 1.844  | 0.496 | -0.752 | 0.340 |
| Feb 2007 | 1.472  | 0.489 | -1.659 | 0.330 |
| Mar 2007 | 1.770  | 0.486 | -1.002 | 0.334 |
| Apr 2007 | 1.626  | 0.473 | -0.923 | 0.323 |
| May 2007 | 1.536  | 0.460 | -0.914 | 0.313 |
| Jun 2007 | 1.518  | 0.452 | -1.003 | 0.306 |
| Jul 2007 | 1.486  | 0.444 | -1.029 | 0.301 |
| Aug 2007 | 1.504  | 0.435 | -0.908 | 0.295 |
| Sep 2007 | 1.419  | 0.425 | -0.933 | 0.289 |
| Oct 2007 | 1.322  | 0.416 | -0.803 | 0.284 |
| Nov 2007 | 1.236  | 0.405 | -0.712 | 0.274 |
| Dec 2007 | 1.325  | 0.393 | -0.810 | 0.264 |
| Jan 2008 | 1.151  | 0.385 | -1.040 | 0.260 |
| Feb 2008 | 1.244  | 0.385 | -1.108 | 0.265 |
| Mar 2008 | 1.572  | 0.376 | -0.532 | 0.261 |
| Apr 2008 | 1.201  | 0.358 | -0.523 | 0.246 |
| May 2008 | 0.885  | 0.345 | -0.640 | 0.235 |
| Jun 2008 | 0.952  | 0.336 | -0.696 | 0.227 |
| Jul 2008 | 0.996  | 0.328 | -0.768 | 0.222 |
| Aug 2008 | 0.883  | 0.321 | -0.857 | 0.220 |
| Sep 2008 | 0.891  | 0.316 | -0.786 | 0.220 |
| Oct 2008 | 0.951  | 0.310 | -0.644 | 0.219 |
| Nov 2008 | 0.917  | 0.301 | -0.540 | 0.212 |
| Dec 2008 | 1.121  | 0.290 | -0.661 | 0.205 |
| Jan 2009 | 0.847  | 0.285 | -1.033 | 0.203 |
| Feb 2009 | 0.778  | 0.285 | -0.434 | 0.208 |
| Mar 2009 | 0.687  | 0.267 | -0.116 | 0.191 |
| Apr 2009 | 0.997  | 0.246 | -0.131 | 0.170 |
| May 2009 | 0.441  | 0.231 | -0.225 | 0.158 |
| Jun 2009 | 0.276  | 0.221 | -0.258 | 0.147 |
| Jul 2009 | 0.176  | 0.212 | -0.370 | 0.138 |
| Aug 2009 | 0.182  | 0.206 | -0.390 | 0.134 |
| Sep 2009 | 0.208  | 0.201 | -0.352 | 0.131 |
| Oct 2009 | 0.176  | 0.195 | -0.217 | 0.129 |
| Nov 2009 | 0.204  | 0.190 | -0.278 | 0.125 |
| Dec 2009 | 0.094  | 0.184 | -0.314 | 0.121 |
| Jan 2010 | 0.083  | 0.180 | -0.427 | 0.120 |
| Feb 2010 | -0.078 | 0.181 | -0.664 | 0.122 |
| Mar 2010 | 0.031  | 0.179 | -0.096 | 0.124 |
| Apr 2010 | 0.260  | 0.168 | 0.051  | 0.115 |
| May 2010 | 0.055  | 0.156 | 0.115  | 0.106 |
| Jun 2010 | -0.065 | 0.147 | 0.010  | 0.096 |
| Jul 2010 | -0.201 | 0.140 | -0.041 | 0.091 |
| Aug 2010 | -0.239 | 0.134 | -0.145 | 0.087 |

|                       |        |       |        |       |
|-----------------------|--------|-------|--------|-------|
| Sep 2010              | -0.145 | 0.129 | -0.105 | 0.086 |
| Oct 2010              | -0.071 | 0.124 | 0.083  | 0.084 |
| Nov 2010              | -0.023 | 0.117 | 0.161  | 0.078 |
| Dec 2010              | -0.171 | 0.106 | 0.435  | 0.068 |
| Jan 2011              | -0.535 | 0.092 | 0.283  | 0.054 |
| Feb 2011              | -0.617 | 0.087 | 0.429  | 0.051 |
| Mar 2011              | -0.489 | 0.070 | 0.759  | 0.041 |
| Apr 2011              | -0.557 | 0.052 | 0.664  | 0.040 |
| May 2011              | -0.634 | 0.040 | 0.601  | 0.044 |
| Jun 2011              | -0.612 | 0.032 | 0.444  | 0.051 |
| Jul 2011              | -0.721 | 0.028 | 0.355  | 0.055 |
| Aug 2011              | -0.773 | 0.024 | 0.323  | 0.057 |
| Sep 2011              | -0.655 | 0.023 | 0.204  | 0.056 |
| Oct 2011              | -0.495 | 0.021 | 0.248  | 0.053 |
| Nov 2011              | -0.381 | 0.021 | 0.090  | 0.050 |
| Dec 2011              | -0.469 | 0.021 | -0.192 | 0.045 |
| Jan 2012              | -0.778 | 0.025 | -0.602 | 0.042 |
| Feb 2012              | -0.433 | 0.028 | 0.039  | 0.036 |
| Mar 2012              | -0.129 | 0.025 | 0.269  | 0.035 |
| Apr 2012              | -0.203 | 0.022 | 0.161  | 0.035 |
| May 2012              | -0.224 | 0.021 | 0.161  | 0.034 |
| Jun 2012              | -0.250 | 0.020 | 0.103  | 0.035 |
| Jul 2012              | -0.416 | 0.019 | 0.059  | 0.034 |
| Aug 2012              | -0.424 | 0.018 | -0.011 | 0.033 |
| Sep 2012              | -0.268 | 0.018 | 0.006  | 0.032 |
| Oct 2012              | -0.170 | 0.018 | 0.139  | 0.032 |
| Nov 2012              | -0.014 | 0.018 | 0.130  | 0.032 |
| Price                 | -0.019 | 0.006 | 0.087  | 0.012 |
| Variety/Buyer Quality | 1.468  | 0.023 | 2.672  | 0.509 |
| New Year              | 0.008  | 0.015 | -0.145 | 0.026 |
| CNY                   | -0.311 | 0.008 | -0.674 | 0.018 |
| Labor Day             | -0.116 | 0.014 | -0.340 | 0.021 |
| National Day          | -0.113 | 0.011 | -0.376 | 0.018 |
| Chingming             | -0.003 | 0.019 | -0.087 | 0.034 |
| Dragon Boat           | -0.065 | 0.018 | -0.113 | 0.034 |
| Mid-Autumn            | 0.084  | 0.019 | -0.195 | 0.034 |
| Double 11 Promotion   | 0.554  | 0.040 | -0.166 | 0.074 |
| Double 12 Promotion   | 0.151  | 0.040 | -0.025 | 0.077 |
| Mon                   | 0.070  | 0.004 | 0.099  | 0.009 |
| Tue                   | 0.051  | 0.004 | 0.144  | 0.008 |
| Wed                   | 0.048  | 0.004 | 0.144  | 0.008 |
| Thu                   | 0.037  | 0.004 | 0.140  | 0.008 |
| Fri                   | 0.048  | 0.004 | 0.096  | 0.008 |
| Sat                   | 0.013  | 0.004 | 0.022  | 0.008 |

|                 |        |       |        |       |
|-----------------|--------|-------|--------|-------|
| CF              | -0.012 | 0.025 | -0.065 | 0.181 |
| CF <sup>2</sup> | 0.073  | 0.011 | -0.238 | 0.129 |
| $\sigma^B$      | 0.200  | 0.012 |        |       |
| $\sigma^S$      | 0.153  | 0.013 |        |       |
| $\rho$          | 0.190  | 0.030 |        |       |

\*standard errors are adjusted for heteroscedasticity.

## Appendix B: Test on Market Size Definition for Sellers

We test the robustness of the estimates to the definition of potential market for sellers. In the paper, we define the potential market for sellers as the number of households scaled by 0.1, implying one out ten households in China will become a Taobao seller, and tested the robustness to other scale factors (e.g., 1, 5, and 20). We also use the number of Internet users as the potential market for sellers, and obtained nearly identical results for all parameters except for the intercept. The mean of the ratios of CNEs for the seller's model (coefficients based on Internet users / coefficients based on no. of households) is 0.991 and the standard deviation is 0.011 (Figure B). The intercept is shifted down from -16.054 to -17.623. All other coefficients remain roughly the same (Table B). This is consistent with the literature that the size of the potential market does not affect estimates of other parameters, but shift the intercepts up or down.

**Figure B: Ratios of CNEs: No. of households vs. Internet users as market size**

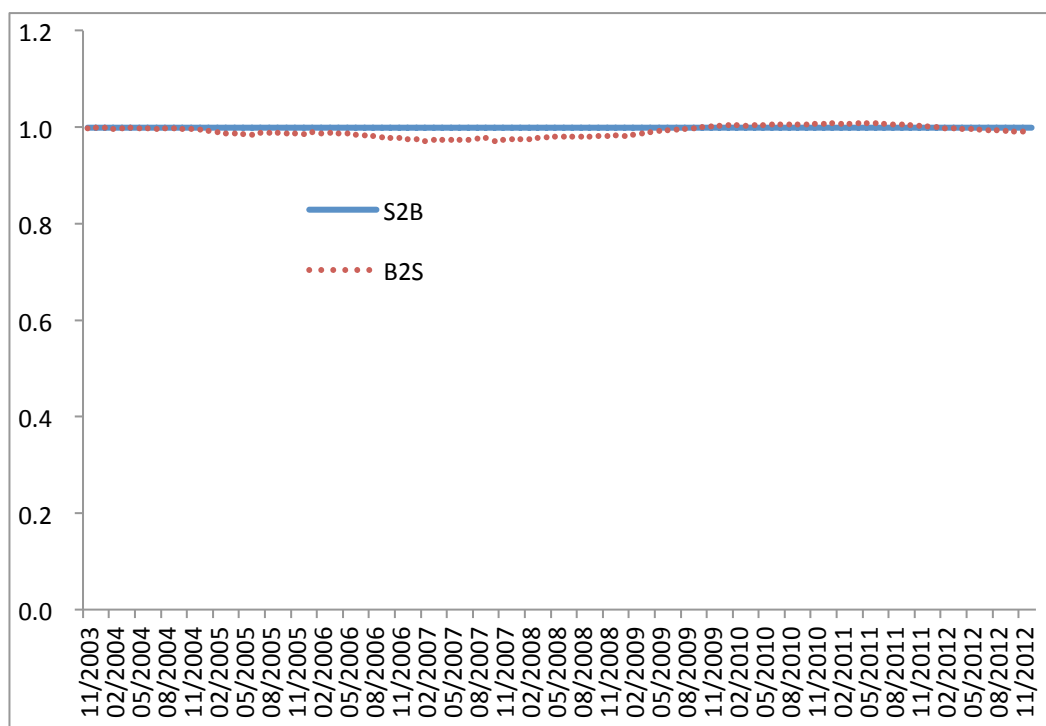

**Table B: Other coefficients from using different market size definitions for sellers\***

|                        | Market size = households/10 |       |              |       | Market size = netizens |       |              |       |
|------------------------|-----------------------------|-------|--------------|-------|------------------------|-------|--------------|-------|
|                        | Buyer model                 |       | Seller model |       | Buyer model            |       | Seller model |       |
|                        | est.                        | s.e.  | est.         | s.e.  | est.                   | s.e.  | est.         | s.e.  |
| intercept              | -29.890                     | 2.233 | -16.054      | 1.632 | -29.891                | 2.150 | -17.623      | 1.534 |
| t/100                  | -0.124                      | 0.175 | 0.176        | 0.131 | -0.125                 | 0.168 | 0.037        | 0.123 |
| (t/100) <sup>2</sup>   | -0.001                      | 0.003 | -0.005       | 0.003 | -0.001                 | 0.003 | -0.004       | 0.002 |
| DNE                    | 0.125                       | 0.063 | -0.167       | 0.240 | 0.124                  | 0.075 | -0.056       | 0.226 |
| Price                  | 0.003                       | 0.018 | 0.048        | 0.016 | 0.003                  | 0.019 | 0.049        | 0.015 |
| Variety                | 1.439                       | 0.061 |              |       | 1.440                  | 0.063 |              |       |
| Buyer quality          |                             |       | 0.025        | 0.009 |                        |       | 0.026        | 0.008 |
| New Year               | -0.005                      | 0.037 | -0.148       | 0.030 | -0.005                 | 0.039 | -0.150       | 0.029 |
| CNY                    | -0.315                      | 0.023 | -0.690       | 0.024 | -0.315                 | 0.024 | -0.689       | 0.023 |
| Labor Day              | -0.127                      | 0.030 | -0.356       | 0.026 | -0.127                 | 0.031 | -0.356       | 0.025 |
| National Day           | -0.126                      | 0.025 | -0.376       | 0.021 | -0.126                 | 0.026 | -0.376       | 0.020 |
| Chingming              | -0.026                      | 0.048 | -0.082       | 0.039 | -0.026                 | 0.050 | -0.079       | 0.036 |
| Dragon Boat            | -0.065                      | 0.048 | -0.120       | 0.039 | -0.065                 | 0.050 | -0.120       | 0.036 |
| Mid-Autumn             | 0.080                       | 0.048 | -0.205       | 0.039 | 0.080                  | 0.050 | -0.204       | 0.037 |
| Double 11              | 0.545                       | 0.103 | -0.188       | 0.090 | 0.545                  | 0.107 | -0.191       | 0.085 |
| Double 12              | 0.140                       | 0.103 | -0.017       | 0.097 | 0.140                  | 0.107 | -0.021       | 0.091 |
| Mon                    | 0.070                       | 0.011 | 0.100        | 0.010 | 0.070                  | 0.012 | 0.100        | 0.010 |
| Tue                    | 0.050                       | 0.011 | 0.142        | 0.010 | 0.050                  | 0.012 | 0.142        | 0.009 |
| Wed                    | 0.047                       | 0.012 | 0.143        | 0.010 | 0.047                  | 0.012 | 0.143        | 0.009 |
| Thu                    | 0.036                       | 0.012 | 0.139        | 0.010 | 0.036                  | 0.012 | 0.139        | 0.009 |
| Fri                    | 0.047                       | 0.012 | 0.095        | 0.009 | 0.047                  | 0.012 | 0.095        | 0.009 |
| Sat                    | 0.013                       | 0.012 | 0.021        | 0.009 | 0.013                  | 0.012 | 0.021        | 0.009 |
| <i>CF</i>              | 0.003                       | 0.118 | 0.205        | 0.048 | 0.002                  | 0.123 | 0.202        | 0.045 |
| <i>CF</i> <sup>2</sup> | -0.025                      | 0.177 | 0.136        | 0.015 | -0.028                 | 0.184 | 0.137        | 0.014 |
| $\sigma^B$             | 0.200                       | 0.013 |              |       | 0.200                  | 0.013 |              |       |
| $\sigma^S$             | 0.150                       | 0.012 |              |       | 0.150                  | 0.012 |              |       |
| $\rho$                 | 0.180                       | 0.028 |              |       | 0.180                  | 0.028 |              |       |

\*standard errors are adjusted for heteroscedasticity.

### Appendix C: Buyer Quality Metric Sensitivity

We used the number of transactions per 100 registered buyers as a measure of buyer quality. To test the robustness of the estimates to the measure of buyer quality, we also estimated the model using the number of transacting buyers per 100 registered buyers. Figure C shows the ratios of the CNEs between the two measures of buyer quality, and Table C reports the estimates of other parameters. We can see that the estimates are robust to this measure.

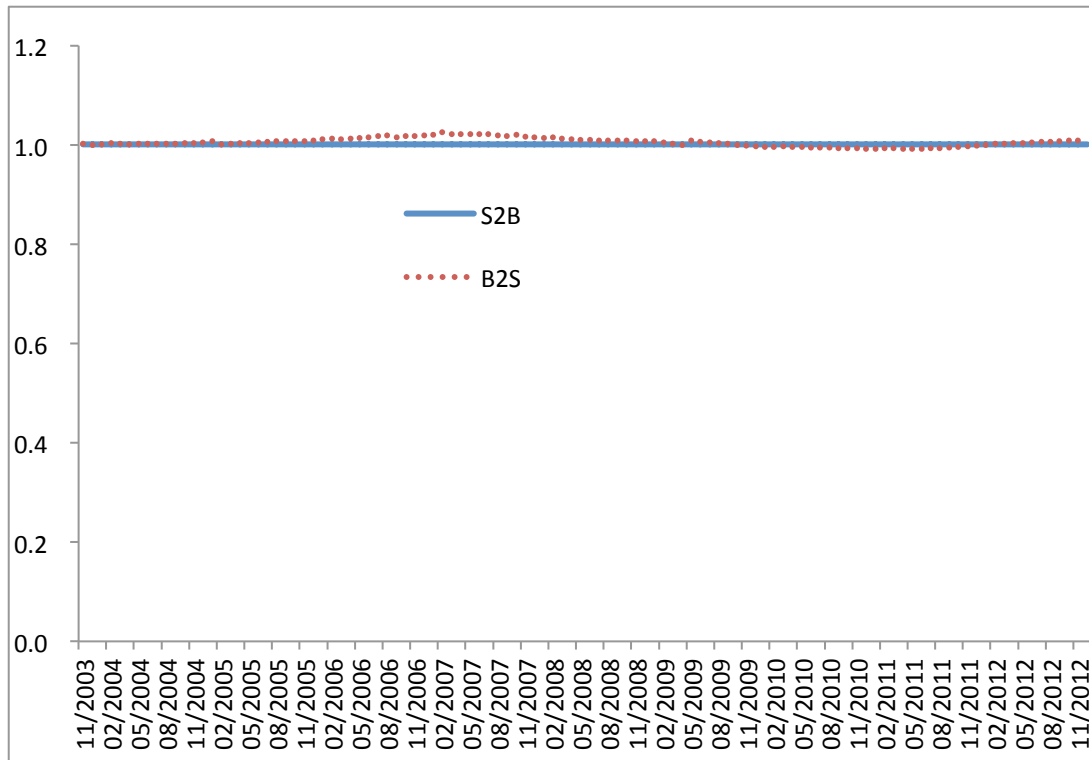

**Figure C: Ratios in CNEs between using per capita transacting buyers as buyer quality and per capita transactions as buyer quality**

**Table C: Other coefficients from using different definitions of buyer quality**

|                        | Buyer quality = transactions /100<br>registered buyers |       |              |       | Buyer quality = transacting buyers /100<br>registered buyers |       |              |       |
|------------------------|--------------------------------------------------------|-------|--------------|-------|--------------------------------------------------------------|-------|--------------|-------|
|                        | Buyer model                                            |       | Seller model |       | Buyer model                                                  |       | Seller model |       |
|                        | est.                                                   | s.e.  | est.         | s.e.  | est.                                                         | s.e.  | est.         | s.e.  |
| intercept              | -29.890                                                | 2.233 | -16.054      | 1.632 | -29.891                                                      | 2.126 | -17.623      | 1.640 |
| t/100                  | -0.124                                                 | 0.175 | 0.176        | 0.131 | -0.125                                                       | 0.166 | 0.037        | 0.131 |
| (t/100) <sup>2</sup>   | -0.001                                                 | 0.003 | -0.005       | 0.003 | -0.001                                                       | 0.003 | -0.004       | 0.003 |
| DNE                    | 0.125                                                  | 0.063 | -0.167       | 0.240 | 0.124                                                        | 0.067 | -0.056       | 0.244 |
| Price                  | 0.003                                                  | 0.018 | 0.048        | 0.016 | 0.003                                                        | 0.018 | 0.049        | 0.015 |
| Variety                | 1.439                                                  | 0.061 |              |       | 1.440                                                        | 0.060 |              |       |
| Buyer quality          |                                                        |       | 0.025        | 0.009 |                                                              |       | 0.026        | 0.012 |
| New Year               | -0.005                                                 | 0.037 | -0.148       | 0.030 | -0.005                                                       | 0.037 | -0.150       | 0.030 |
| CNY                    | -0.315                                                 | 0.023 | -0.690       | 0.024 | -0.315                                                       | 0.022 | -0.689       | 0.021 |
| Labor Day              | -0.127                                                 | 0.030 | -0.356       | 0.026 | -0.127                                                       | 0.030 | -0.356       | 0.026 |
| National Day           | -0.126                                                 | 0.025 | -0.376       | 0.021 | -0.126                                                       | 0.025 | -0.376       | 0.020 |
| Chingming              | -0.026                                                 | 0.048 | -0.082       | 0.039 | -0.026                                                       | 0.048 | -0.079       | 0.039 |
| Dragon Boat            | -0.065                                                 | 0.048 | -0.120       | 0.039 | -0.065                                                       | 0.047 | -0.120       | 0.039 |
| Mid-Autumn             | 0.080                                                  | 0.048 | -0.205       | 0.039 | 0.080                                                        | 0.048 | -0.204       | 0.039 |
| Double 11              | 0.545                                                  | 0.103 | -0.188       | 0.090 | 0.545                                                        | 0.102 | -0.191       | 0.085 |
| Double 12              | 0.140                                                  | 0.103 | -0.017       | 0.097 | 0.140                                                        | 0.102 | -0.021       | 0.086 |
| Mon                    | 0.070                                                  | 0.011 | 0.100        | 0.010 | 0.070                                                        | 0.011 | 0.100        | 0.010 |
| Tue                    | 0.050                                                  | 0.011 | 0.142        | 0.010 | 0.050                                                        | 0.011 | 0.142        | 0.009 |
| Wed                    | 0.047                                                  | 0.012 | 0.143        | 0.010 | 0.047                                                        | 0.011 | 0.143        | 0.010 |
| Thu                    | 0.036                                                  | 0.012 | 0.139        | 0.010 | 0.036                                                        | 0.011 | 0.139        | 0.009 |
| Fri                    | 0.047                                                  | 0.012 | 0.095        | 0.009 | 0.047                                                        | 0.011 | 0.095        | 0.009 |
| Sat                    | 0.013                                                  | 0.012 | 0.021        | 0.009 | 0.013                                                        | 0.011 | 0.021        | 0.009 |
| <i>CF</i>              | 0.003                                                  | 0.118 | 0.205        | 0.048 | 0.002                                                        | 0.117 | 0.202        | 0.052 |
| <i>CF</i> <sup>2</sup> | -0.025                                                 | 0.177 | 0.136        | 0.015 | -0.028                                                       | 0.175 | 0.137        | 0.013 |
| $\sigma^B$             | 0.200                                                  | 0.013 |              |       | 0.200                                                        | 0.013 |              |       |
| $\sigma^S$             | 0.150                                                  | 0.012 |              |       | 0.150                                                        | 0.012 |              |       |
| $\rho$                 | 0.180                                                  | 0.028 |              |       | 0.180                                                        | 0.029 |              |       |

\*standard errors are adjusted for heteroscedasticity.
